# Supplementary material for: Circulating Tumor DNA Analysis Detects FGFR2 Amplification and Concurrent Genomic Alterations Associated with FGFR Inhibitor Efficacy in Advanced Gastric Cancer
Source: PubMed Central journal article supplement — Clin Cancer Res. 2021 Aug 10;27(20):5619–27. doi: 10.1158/1078-0432.CCR-21-1414 (PMC9401460; doi:10.1158/1078-0432.ccr-21-1414), 2021-08-10
Supplement: 10780432ccr211414-sup-264192_2_supp_7269217_qwjmm7.pdf [file 10780432ccr211414-sup-264192_2_supp_7269217_qwjmm7.pdf]

**Supplementary Table 1. BAC clones used for FISH analysis**

| BAC clone  | Position (bp)       | Total length (bp) | Primer   | Sequence             | Product (bp) |
|------------|---------------------|-------------------|----------|----------------------|--------------|
| RP11-7P17  | 123080057-123255783 | 175726            | FGFR2-F1 | GGGACCCACAACATGTTACC | 222          |
|            |                     |                   | FGFR2-R1 | TGTACCCCAGGCTGTCCTTA |              |
| RP11-62L18 | 123224101-123398498 | 174397            | FGFR2-F2 | TTGCCGGATTTAGGTTTCAC | 204          |
|            |                     |                   | FGFR2-R2 | GTGAGCTGGGTTTGGTCTGT |              |

Abbreviations: BAC, bacterial artificial chromosome; FISH, fluorescence in situ hybridization; bp, base pairs.
