# Supplementary material for: Circulating Tumor DNA Analysis Detects FGFR2 Amplification and Concurrent Genomic Alterations Associated with FGFR Inhibitor Efficacy in Advanced Gastric Cancer
Source: PubMed Central journal article supplement — Clin Cancer Res. 2021 Aug 10;27(20):5619–27. doi: 10.1158/1078-0432.CCR-21-1414 (PMC9401460; doi:10.1158/1078-0432.ccr-21-1414), 2021-08-10
Supplement: 10780432ccr211414-sup-264192_2_supp_7269218_qwjmm7.pdf [file 10780432ccr211414-sup-264192_2_supp_7269218_qwjmm7.pdf]

**Supplementary Table 2. Association between the *FGFR2* amplification status and clinicopathological features**

| Factors                          |            | <i>FGFR2</i> amplification status               |         |                                                 |        | <i>P</i> value |
|----------------------------------|------------|-------------------------------------------------|---------|-------------------------------------------------|--------|----------------|
|                                  |            | Tissue <sup>+</sup> ctDNA <sup>+</sup><br>(n=6) |         | Tissue <sup>-</sup> ctDNA <sup>+</sup><br>(n=6) |        |                |
| Age (average ± SD)               |            | 61.5 ± 17.7                                     |         | 62.5 ± 11.9                                     |        | 0.748          |
| Sex                              | Male       | 3                                               | (50.0)  | 4                                               | (66.7) | 1.000          |
|                                  | Female     | 3                                               | (50.0)  | 2                                               | (33.3) |                |
| ECOG PS                          | 0          | 4                                               | (66.7)  | 4                                               | (66.7) | 1.000          |
|                                  | 1 or 2     | 2                                               | (33.3)  | 2                                               | (33.3) |                |
| Location                         | EGJ        | 1                                               | (16.7)  | 1                                               | (16.7) | 1.000          |
|                                  | Gastric    | 5                                               | (83.3)  | 5                                               | (83.3) |                |
| Histology                        | Intestinal | 1                                               | (16.7)  | 3                                               | (50.0) | 0.546          |
|                                  | Diffuse    | 5                                               | (83.3)  | 3                                               | (50.0) |                |
| HER2 status (IHC/FISH)           | Negative   | 5                                               | (83.3)  | 5                                               | (83.3) | 1.000          |
|                                  | Positive   | 1                                               | (16.7)  | 1                                               | (16.7) |                |
| Number of organs with metastasis | ≤ 2        | 4                                               | (66.7)  | 4                                               | (66.7) | 1.000          |
|                                  | ≥ 3        | 2                                               | (33.3)  | 2                                               | (33.3) |                |
| Site of metastasis               | Lymph node | 6                                               | (100.0) | 5                                               | (83.3) | 1.000          |
|                                  | Peritoneum | 3                                               | (50.0)  | 3                                               | (50.0) | 1.000          |
|                                  | Liver      | 1                                               | (16.7)  | 2                                               | (33.3) | 1.000          |

\*The left subcolumn (without parentheses) represents the number of patients and the right subcolumn (with parentheses) represents the percentage of patients.

Abbreviations: ctDNA, circulating tumor DNA; SD, standard deviation; ECOG PS, Eastern Cooperative Oncology Group performance status; EGJ, esophagogastric junction; IHC, immunohistochemistry; FISH, fluorescence in situ hybridization.
