# Supplementary material for: Circulating Tumor DNA Analysis Detects FGFR2 Amplification and Concurrent Genomic Alterations Associated with FGFR Inhibitor Efficacy in Advanced Gastric Cancer
Source: PubMed Central journal article supplement — Clin Cancer Res. 2021 Aug 10;27(20):5619–27. doi: 10.1158/1078-0432.CCR-21-1414 (PMC9401460; doi:10.1158/1078-0432.ccr-21-1414), 2021-08-10
Supplement: 10780432ccr211414-sup-264192_2_supp_7269219_qwjmm7.pdf [file 10780432ccr211414-sup-264192_2_supp_7269219_qwjmm7.pdf]

**Supplementary Table 3. Alterations detected by ctDNA sequencing**

|                             | Patient 1                  |         | Patient 2            |         | Patient 3            |         |                      |         |
|-----------------------------|----------------------------|---------|----------------------|---------|----------------------|---------|----------------------|---------|
| Timing for FGFR inhibition  | Pretreatment               |         | Pretreatment         |         | Pretreatment         |         | Postprogression      |         |
| Amplification               | Alterations                | pCN     | Alterations          | pCN     | Alterations          | pCN     | Alterations          | pCN     |
|                             | <i>FGFR2</i>               | 24.2    | <i>FGFR2</i>         | 6.0     | <i>FGFR2</i>         | 14.6    | <i>FGFR2</i> amp     | 7.3     |
|                             | <i>ERBB2</i>               | 2.5     |                      |         | <i>MET</i>           | 3.0     | <i>MET</i>           | 15.7    |
|                             | <i>CDK4</i>                | 9.5     |                      |         |                      |         | <i>KRAS</i>          | 2.4     |
|                             | <i>CCND1</i>               | 2.3     |                      |         |                      |         |                      |         |
|                             | <i>CCNE1</i>               | 2.3     |                      |         |                      |         |                      |         |
| Actionable mutations        | Alterations                | VAF (%) | Alterations          | VAF (%) | Alterations          | VAF (%) | Alterations          | VAF (%) |
|                             | <i>NF1</i> splice site SNV | 0.2     | <i>APC</i> E1257*    | 0.8     | <i>CTNNB1</i> S37F   | 0.8     | <i>CTNNB1</i> S37F   | 13.2    |
|                             | <i>TP53</i> G245S          | 28.8    | <i>APC</i> T1556fs   | 0.6     | <i>TP53</i> R213*    | 12.2    | <i>TP53</i> R213*    | 49.3    |
|                             |                            |         | <i>ARID1A</i> L1731* | 2.2     | <i>ARID1A</i> W1023* | 1.5     | <i>ARID1A</i> W1023* | 26.1    |
| Actionable fusions          | Alterations                | VAF (%) | Alterations          | VAF (%) | Alterations          | VAF (%) | Alterations          | VAF (%) |
|                             | <i>FGFR2-TACC2</i>         | 0.1     |                      |         |                      |         |                      |         |
| VUS or synonymous mutations | Alterations                | VAF (%) | Alterations          | VAF (%) | Alterations          | VAF (%) | Alterations          | VAF (%) |
|                             | <i>BRCA1</i> N682Y         | 4.5     | <i>FGFR2</i> L763L   | 0.7     | <i>EGFR</i> P518L    | 1.4     | <i>EGFR</i> P518L    | 13.8    |
|                             | <i>BRCA1</i> S681I         | 4.4     | <i>EGFR</i> L249L    | 0.2     | <i>ARAF</i> P483P    | 3.5     | <i>ARAF</i> P483P    | 0.15    |

Abbreviations: ctDNA, circulating tumor DNA; pCN, plasma copy number; amp, amplification; VAF, variant allele frequency; SNV, single nucleotide variant; VUS, variant of unknown significance.
