# Supplementary material for: Circulating Tumor DNA Analysis Detects FGFR2 Amplification and Concurrent Genomic Alterations Associated with FGFR Inhibitor Efficacy in Advanced Gastric Cancer
Source: PubMed Central journal article supplement — Clin Cancer Res. 2021 Aug 10;27(20):5619–27. doi: 10.1158/1078-0432.CCR-21-1414 (PMC9401460; doi:10.1158/1078-0432.ccr-21-1414), 2021-08-10
Supplement: 10780432ccr211414-sup-264192_2_supp_7269224_qwjmm7.pdf [file 10780432ccr211414-sup-264192_2_supp_7269224_qwjmm7.pdf]

### **Supplementary Figure 1**

OS based on the Kaplan–Meier method for patients with *FGFR2* amplification detected in tissue<sup>+</sup>ctDNA<sup>+</sup> or tissue<sup>-</sup>ctDNA<sup>+</sup> versus in tissue<sup>-</sup>ctDNA<sup>-</sup>. Abbreviations: OS, overall survival; ctDNA, circulating tumor DNA.

### **Supplementary Figure 2**

Box plots show max VAF in the tissue<sup>+</sup>ctDNA<sup>+</sup> and tissue<sup>-</sup>ctDNA<sup>+</sup> groups. Boxes represent the 25th–75th percentiles, centerlines indicate the median, and whiskers extend to the maximum and minimum values. Abbreviations: max VAF, maximum variant allele frequency; ctDNA, circulating tumor DNA.

### **Supplementary Figure 3**

Immunohistochemical staining and FISH images of *FGFR* in biopsy specimens from the primary tumor of Patient 2. Orange and green signals represent *FGFR2* and *CEP10* in FISH analysis, respectively. Abbreviations: FISH, fluorescence in situ hybridization.
