# Supplementary figures and images for: Circulating Tumor DNA Analysis Detects FGFR2 Amplification and Concurrent Genomic Alterations Associated with FGFR Inhibitor Efficacy in Advanced Gastric Cancer
Source: PubMed Central journal article supplement — Clin Cancer Res. 2021 Aug 10;27(20):5619–27. doi: 10.1158/1078-0432.CCR-21-1414 (PMC9401460; doi:10.1158/1078-0432.ccr-21-1414), 2021-08-10

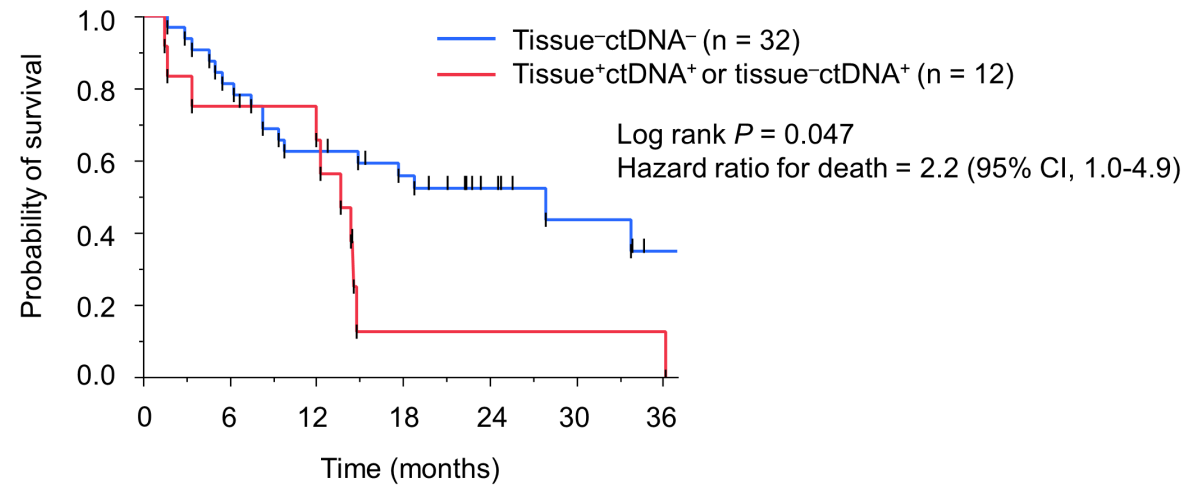

Supplementary Figure 1

Supplement: 10780432ccr211414-sup-264192_2_supp_7269220_qwjmm7.pdf [file 10780432ccr211414-sup-264192_2_supp_7269220_qwjmm7.pdf]

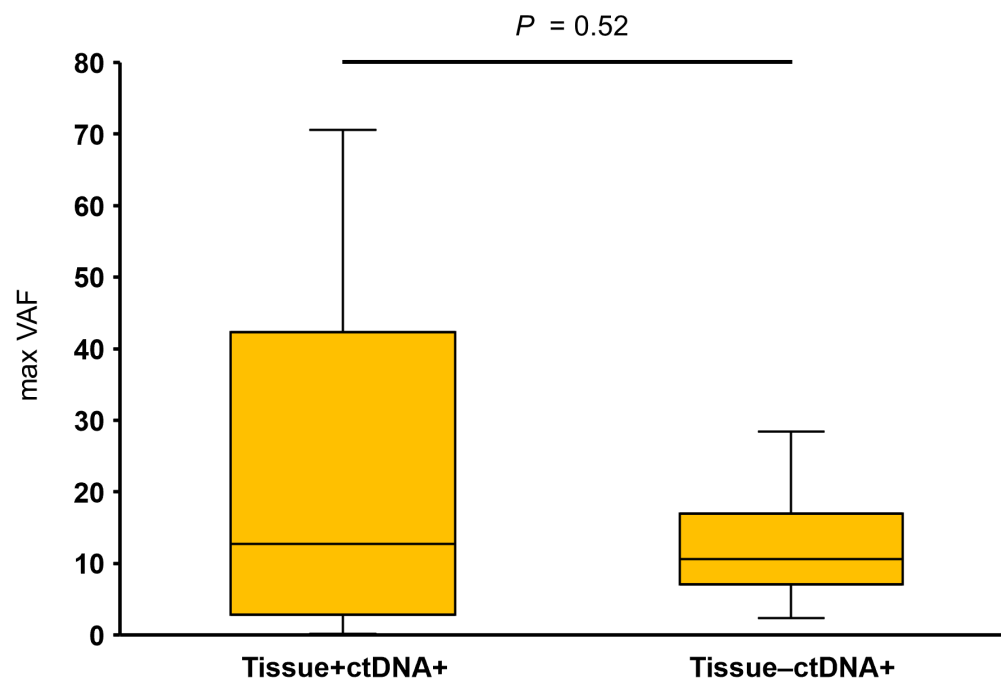

Supplementary Figure 2

Supplement: 10780432ccr211414-sup-264192_2_supp_7269221_qwjmm7.pdf [file 10780432ccr211414-sup-264192_2_supp_7269221_qwjmm7.pdf]

FGFR2 IHC

FGFR2 FISH

Pretreatment

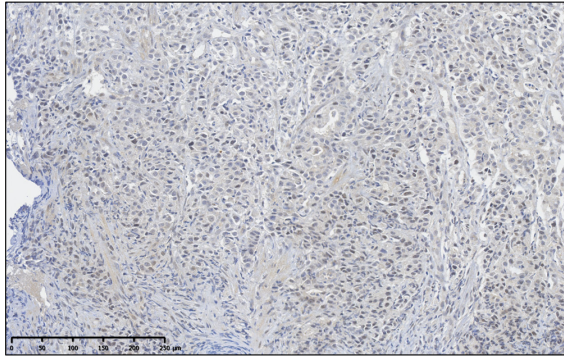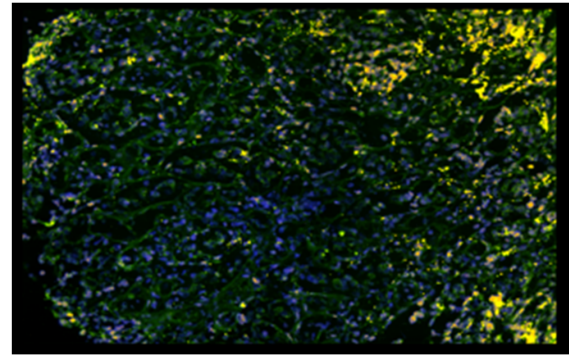

After chemotherapy  
(S-1 plus oxaliplatin)

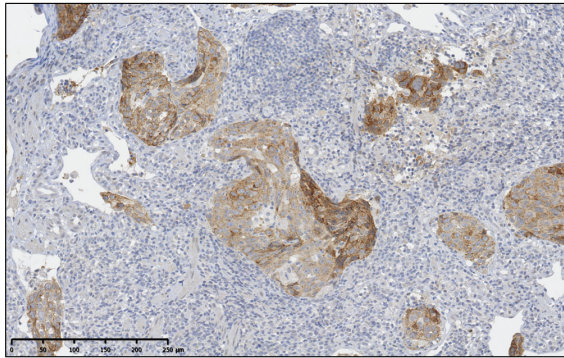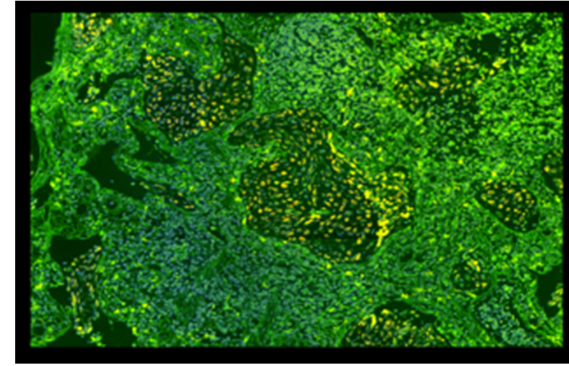

Supplementary Figure 3

Supplement: 10780432ccr211414-sup-264192_2_supp_7269222_qwjmm7.pdf [file 10780432ccr211414-sup-264192_2_supp_7269222_qwjmm7.pdf]
